# Supplementary material for: Evaluation of the Effect of Betulin and Its Alkynyl Derivatives on the Profile of Changes in Gene Expression of the Inflammatory Process of Colorectal Adenocarcinoma Cells (HT-29 Cell Line)
Source: MDPI journal article supplement (doi:10.3390/pr11092676), 2023-09-06
Supplement: s1 [file s1]

## Supplementary Materials

**Table S1.** The characteristic spectral data for tested compounds **1**, **2** and **3**.

| Compound | <sup>1</sup> H NMR (600 MHz) δ <sub>H</sub> [ppm]                                                                                                                                                                                                                                   | <sup>13</sup> C NMR (600 MHz) δ <sub>C</sub> [ppm]                                                                                            |
|----------|-------------------------------------------------------------------------------------------------------------------------------------------------------------------------------------------------------------------------------------------------------------------------------------|-----------------------------------------------------------------------------------------------------------------------------------------------|
| <b>1</b> | 1.69 (s, 3H, H-30)<br>2.45 (m, 1H, H-19)<br>2.91 (s, 1H, C≡C)<br>3.21 (m, 1H, H-3)<br>4.02 (d, <i>J</i> = 10.8 Hz, H-28)<br>4.41 (d, <i>J</i> = 10.8 Hz, H-28)<br>4.61 (s, 1H, H-29)<br>4.71 (s, 1H, H-29)                                                                          | 19.11 (C-30)<br>47.66 (C-19)<br>64.90 (C-28)<br>74.67 (C≡C)<br>74.79 (C≡C)<br>78.98 (C-3)<br>110.03 (C-29)<br>149.92 (C-20)<br>153.31 (O-C=O) |
| <b>2</b> | 1.69 (s, 3H, H-30)<br>2.45 (m, 1H, H-19)<br>2.55 (t, 1H, <i>J</i> = 2.4 Hz, C≡C)<br>3.21 (m, 1H, H-3)<br>3.98 (d, <i>J</i> = 10.8 Hz, H-28)<br>4.41 (d, <i>J</i> = 10.8 Hz, H-28)<br>4.61 (s, 1H, H-29)<br>4.71 (s, 1H, H-29)<br>4.75 (d, <i>J</i> = 2.4 Hz, 2H, OCH <sub>2</sub> ) | 19.12 (C-30)<br>47.67 (C-19)<br>67.31 (C-28)<br>75.67 (C≡C)<br>78.97 (C-3)<br>109.97 (C-29)<br>149.99 (C-20)<br>155.10 (O-C=O)                |
| <b>3</b> | 1.69 (s, 3H, H-30)<br>2.21 (m, 2H, OCH <sub>2</sub> CH <sub>2</sub> )<br>2.53 (t, 1H, <i>J</i> = 2.4 Hz, C≡C)<br>3.01 (m, 1H, H-19)<br>3.18 (m, 1H, H-3)<br>4.16 (m, 2H, OCH <sub>2</sub> CH <sub>2</sub> )<br>4.59 (s, 1H, H-29)<br>4.73 (s, 1H, H-29)                             | 19.06 (C-30)<br>47.02 (C-19)<br>69.75 (C≡C)<br>79.00 (C-3)<br>109.57 (C-29)<br>150.57 (C-20)<br>175.92 (C-28)                                 |

## Ad.2

The first step was to calculate the retardation factor (*R<sub>f</sub>*). This parameter defines the ratio of the length of the path traveled by the substance *a* to the length of the path of the mobile phase front *b* (in cm).

$$R_f = \frac{a}{b}$$

The obtained values of retardation factor (*R<sub>f</sub>*) were converted to *R<sub>M</sub>* parameters according to equation:

$$R_M = \log \frac{1}{R_f} - 1$$

The  $R_M$  parameter was calculated for every concentration of acetone and extrapolated to zero concentration of organic component in the mobile phase. The chromatographic parameter of lipophilicity ( $R_{M0}$ ) was calculated using equation:

$$R_M = R_{M0} + bc$$

where  $C$  is the concentration of acetone in the mobile phase, while  $b$  is the slope of the regression plot.

**Table S2.**  $R_{M0}$ ,  $b$ ,  $R$  parameters for betulin and compounds 1-3 in acetone: Tris buffer aqueous solution

| Substance | $R_{M0}$ | $b$    | $R$   |
|-----------|----------|--------|-------|
| Betulin   | 3,765    | -0,062 | 0,988 |
| 1         | 5,763    | -0,064 | 0,992 |
| 2         | 6,413    | -0,073 | 0,983 |
| 3         | 6,197    | -0,07  | 0,984 |

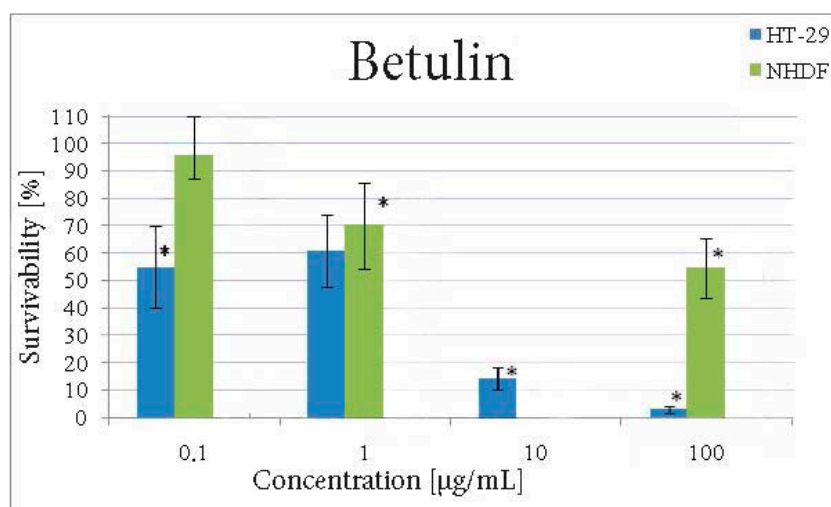

**Figure S1.** Viability of HT-29, NHDF after exposure to **betulin** at concentrations of 0.1 µg/mL; 1 µg/mL; 10 µg/mL; 100 µg/mL compared to control cells (0 µM). The absorbance value obtained in control cell cultures was taken as 100%. Cell survival is shown as a percentage of control values ± standard deviation of % cell growth. ANOVA, post hoc Tukey;

\* - statistical significance,  $p < 0.05$

- no result for concentration 10 µg/mL on the NHDF cell line

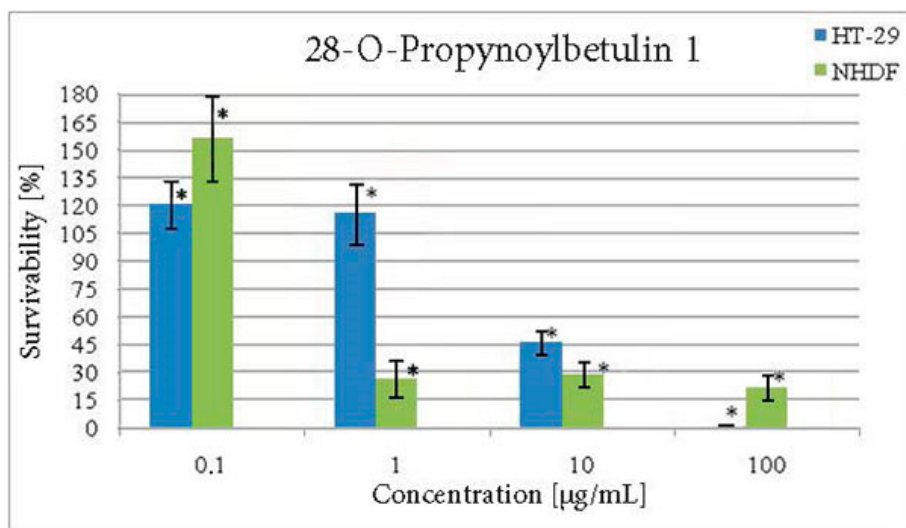

**Figure S2.** Viability of HT-29, NHDF after exposure to 2-O-Propynoylbetulin **1** at concentrations of 0.1 µg/mL; 1 µg/mL; 10 µg/mL; 100 µg/mL compared to control cells (0 µM). The absorbance value obtained in control cell cultures was taken as 100%. Cell survival is shown as a percentage of control values ± standard deviation of % cell growth. ANOVA, post hoc Tukey;

\* - statistical significance,  $p < 0.05$

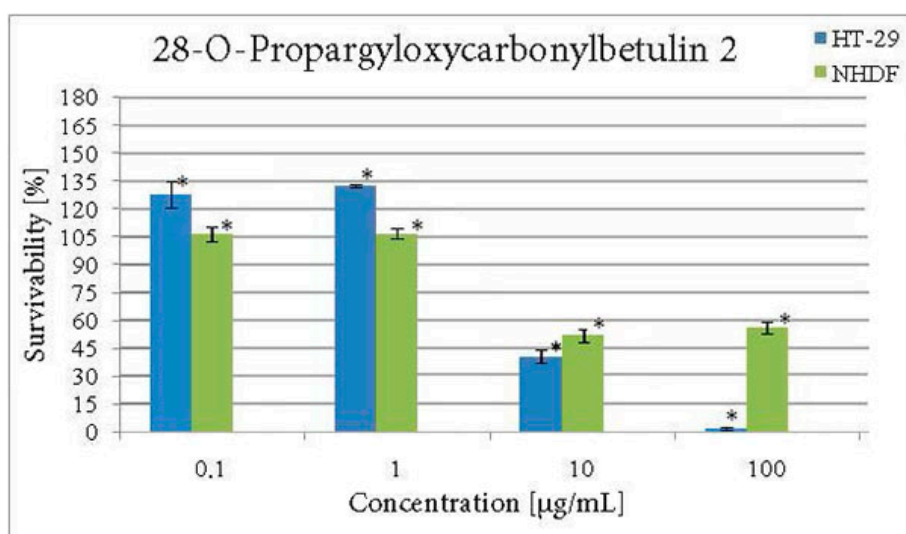

**Figure S3.** Viability of HT-29, NHDF after exposure to 28-O-propargyloxycarbonylbetulin **2** at concentrations of 0.1 µg/mL; 1 µg/mL; 10 µg/mL; 100 µg/mL compared to control cells (0 µM). The absorbance value obtained in control cell cultures was taken as 100%. Cell survival is shown as a percentage of control values ± standard deviation of % cell growth. ANOVA, post hoc Tukey;

\* - statistical significance,  $p < 0.05$

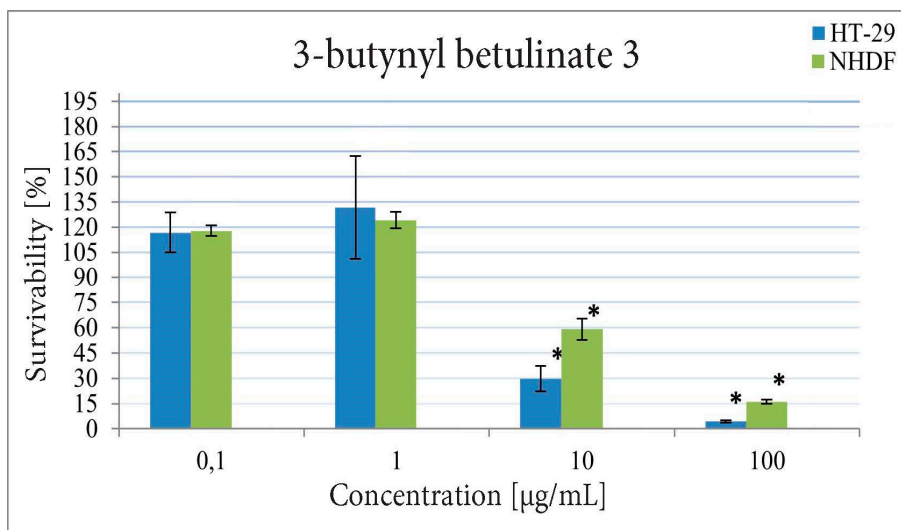

**Figure S4.** Viability of HT-29, NHDF after exposure to betulinic acid 3-butynyl ester **3** at concentrations of 0.1 µg/mL; 1 µg/mL; 10 µg/mL; 100 µg/mL compared to control cells (0 µM). The absorbance value obtained in control cell cultures was taken as 100%. Cell survival is shown as a percentage of control values  $\pm$  standard deviation of % cell growth. ANOVA, post hoc Tukey;

\* - statistical significance,  $p < 0.05$

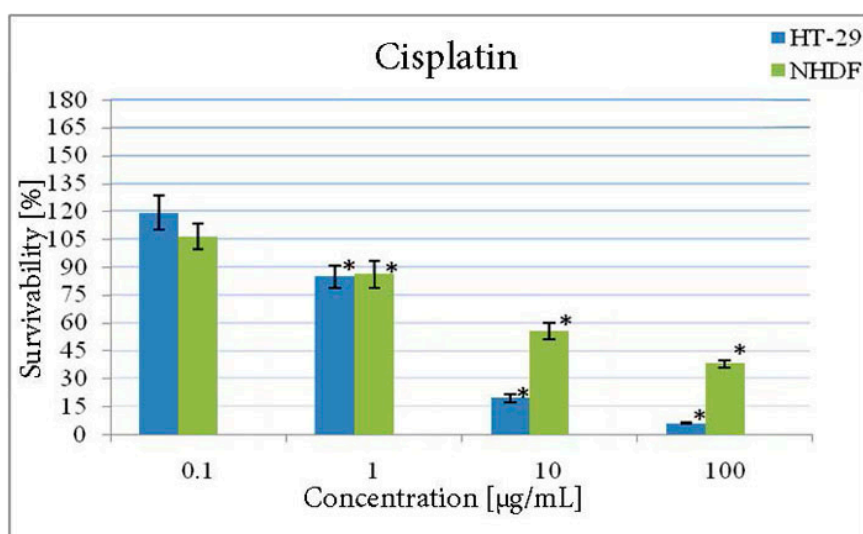

**Figure S5.** Viability of HT-29, NHDF after exposure to cisplatin at concentrations of 0.1 µg/mL; 1 µg/mL; 10 µg/mL; 100 µg/mL compared to control cells (0 µM). The absorbance value obtained in control cell cultures was taken as 100%. Cell survival is shown as a percentage of control values  $\pm$  standard deviation of % cell growth. ANOVA, post hoc Tukey;

\* - statistical significance,  $p < 0.05$
